# Supplementary material for: Nutritional status and TB treatment outcomes in Addis Ababa, Ethiopia: An ambi-directional cohort study
Source: PubMed Central journal article supplement (PMC7924797; doi:10.1371/journal.pone.0247945), 2021-03-02
Supplement: pone.0247945.s009.pdf [file pone.0247945.s009.pdf]

## English version Questionnaire

| <b><u>Identification</u></b>                                   |                               |
|----------------------------------------------------------------|-------------------------------|
| Sub city name : _____                                          | Health facility name: : _____ |
| ID number: _____                                               |                               |
| Date of interview _____ Time started _____ Time finished _____ |                               |
| Data collector's Name _____ signature _____ Date _____         |                               |
| Supervisor's Name _____ signature _____ Date _____             |                               |

### **Section 1: Socio-Demographic characteristics Information**

| S.No. | QEUSTION                | Response                                                                                                        | Code |
|-------|-------------------------|-----------------------------------------------------------------------------------------------------------------|------|
| 101   | Your sex                | 1= Male 2=Female                                                                                                | __   |
| 102   | Your age (in years)     |                                                                                                                 | __   |
| 103   | Your marital status     | 1=Married -<br>2=Living together<br>3= Divorced/separated<br>4=Widowed<br>5=Never Married and Living Together   | __   |
| 104   | Your educational status | 1= No formal Education<br>2=1-8 Grade<br>3=9-10 Grade<br>4=11-12 Grade<br>5= Above 12 Grade                     | __   |
| 105   | Your occupation         | 1=Governmental employee<br>2= Daily laborer<br>3= Merchant<br>4=House wife<br>5=Student<br>Other (specify-----) | __   |

### **Section 2: Clinical characteristics information**

| S.NO | Question                               | Response                                                                               | Code |
|------|----------------------------------------|----------------------------------------------------------------------------------------|------|
| 201  | AFB sputum smear positivity            | 1=Smear positive pulmonary TB<br>2=Smear Negative pulmonary TB<br>3=Extra Pulmonary TB | __   |
| 202  | TB HIV Co-infection                    | 1=Yes<br>2=No                                                                          | __   |
| 203  | Other Non-communicable diseases        | 1=Diabetes<br>2=Cancer<br>3=Hypertension<br>4=Other specify                            | __   |
| 204  | History of Tuberculosis                | 1=New case<br>2= Relapsed case<br>3= Treatment failure                                 | __   |
| 205  | Initial date of treatment (DD-MM-YYYY) | _   _   _   _   _   _                                                                  | _    |

### **Section 3: Nutritional status assessment**

| S.N | Nutritional measurement     | At the start of treatment | At two months of treatment | At end of six months of treatment |
|-----|-----------------------------|---------------------------|----------------------------|-----------------------------------|
| 301 | Bodyweight in kilogram (Kg) |                           |                            |                                   |
| 302 | Height in centimeter(cm)    |                           |                            |                                   |
| 303 | BMI (kg/h <sup>2</sup> )    |                           |                            |                                   |

### **Section 4: Nutritional Counseling and Support**

| S.N | Question                                                                          | Response        | Code |
|-----|-----------------------------------------------------------------------------------|-----------------|------|
| 401 | Have you got nutritional counseling from a health care provider in this facility? | 1. Yes<br>2. No | __   |
| 402 | Have you got food support from any source?                                        | 1. Yes<br>2. No | __   |

### **Section 5: TB treatment outcomes at end of 6 months**

| <b><u>S.N</u></b> | <b>Status of the Treatment</b> | <b>Response</b>            | <b>Code</b> |
|-------------------|--------------------------------|----------------------------|-------------|
| 501               | Treatment Completed            | 1=Yes<br>2=No              | __          |
| 502               | Treatment cured                | 1=Yes<br>2=No              | __          |
| 503               | Treatment success              | 1=Yes<br>2=No              | __          |
| 504               | Default                        | 1=Yes<br>2=No              | __          |
| 505               | Death                          | 1=Yes<br>2=No              | __          |
| 506               | Date of Outcome DD/MM/YYYY     | __  __  __  __  __  __  __ | __          |

### **Section 6: Smear sputum test result only for pulmonary TB Patient only**

| <b><u>S.N</u></b> | <b>Smear sputum test</b>               | <b>Response</b>          | <b>Code</b> |
|-------------------|----------------------------------------|--------------------------|-------------|
| 601               | At end of two months of treatment      | 1=Positive<br>2=Negative | __          |
| 602               | At end of the fifth month of treatment | 1=Positive<br>2=Negative | __          |
| 603               | At end of six months of treatment      | 1=Positive<br>2=Negative | __          |
