# Supplementary material for: Nutritional status and TB treatment outcomes in Addis Ababa, Ethiopia: An ambi-directional cohort study
Source: PubMed Central journal article supplement (PMC7924797; doi:10.1371/journal.pone.0247945), 2021-03-02
Supplement: pone.0247945.s010.pdf [file pone.0247945.s010.pdf]

**የአማርኛ የመጠየቅ ቅፅ**

የክፍለከተማ ስም: \_\_\_\_\_ የጤና ድርጅቱ ስም: \_\_\_\_\_.

የመጠይቁ መለያ ቁጥር: \_\_\_\_\_ የታካሚው የካርድ ቁጥር: \_\_\_\_\_.

ሕክምናውን የተጀመረበት ቀን: \_\_\_\_\_ የሚያለቅበት ቀን ሰዓት: \_\_\_\_\_.

መረጃ የተሰበሰበበት ቀን: \_\_\_\_\_.

የመረጃ ሰብሳቢው ስም: \_\_\_\_\_ ፊርማ: \_\_\_\_\_ ቀን: \_\_\_\_\_.

ተቆጣጣሪው ስም: \_\_\_\_\_ ፊርማ: \_\_\_\_\_ ቀን: \_\_\_\_\_.

**ክፍል 1: ስለ ቤተሰብ አጠቃላይ የመረጃ ሁኔታ መጠይቅ**

| ተ.ቁ | ጥያቄ        | መልስ                                                                                                   | ክድ                       |
|-----|------------|-------------------------------------------------------------------------------------------------------|--------------------------|
| 101 | ፆታ         | 1= ወንድ<br>2= ሴት                                                                                       | <input type="checkbox"/> |
| 102 | እድሜ        |                                                                                                       | <input type="checkbox"/> |
| 103 | የጋብቻ ሁኔታ   | 1= ያገባ<br>2= የተለያየ<br>3= የሞተበት<br>4= ያላገባ                                                             | <input type="checkbox"/> |
| 104 | የትምህርት ሁኔታ | 1= ማንበብ እና መፃፍ የሚችል<br>2= ከ1-8 ክፍል<br>3= ከ9 – 10 ክፍል<br>4= የቀለም/የሞያ ት/ት ከ 11-12 ክፍል<br>5= ከ12 ክፍል በላይ | <input type="checkbox"/> |
| 105 | ሥራ         | 1= የመንግስት ሰራተኛ<br>2= የቀን ሰራተኛ<br>3= ነጋዴ<br>4= የቤት እመቤት<br>5= ተማሪ<br>6= ሌላ ከሆነ ይጥቀሱ                    | <input type="checkbox"/> |

**ክፍል 2: ከበሽታ ጋር የተገናኙ መጠይቆች**

| ተ.ቁ | ጥያቄ                            | መልስ                                                           | ኮድ                       |
|-----|--------------------------------|---------------------------------------------------------------|--------------------------|
| 201 | የቲቢ አይነት                       | 1= የአክታ ፖዘቲቭ የሳንባ ቲቢ<br>2= የአክታ ኔጋቲቭ የሳንባ ቲቢ<br>3= ከሳን ባውጪ ቲቢ | <input type="checkbox"/> |
| 202 | ቲቢ/ኤችአይቪ ህምተኛ ኖት               | 1= አዎ<br>2= አይደለም                                             | <input type="checkbox"/> |
| 203 | ሌላ ተላላፊ ያልሆኑ በሽታዎች አለባቸው       | 1= የስኳር ብሽታ<br>2= ካንሰር<br>3= የደም ግፊት<br>4= ሌላ ካለ ይጥቀሱ         | <input type="checkbox"/> |
| 204 | የቲቢ ሁኔታ                        | 1= አዲስ ቲቢ<br>2= ሕክምናው ያልሰራ<br>3= ያገረሽ<br>4= ያቋረጠ              | <input type="checkbox"/> |
| 205 | ህክምና የተጀመረበት ቀን<br>(ቀን/ወር/ዓመት) |                                                               |                          |

**ክፍል 3: ስነ ምግብ ሁኔታ መዳሰስ**

| ተ.ቁ | የስነ ምግብ ሁኔታ          | ሕክምና ሲጀምሩ | ሁለተኛ ወር ሲጨርሱ | ሕክምናውን ሲጨርሱ | ኮድ                       |
|-----|----------------------|-----------|--------------|-------------|--------------------------|
| 301 | የሰውነት ክብደት በኪሎ       |           |              |             | <input type="checkbox"/> |
| 302 | የሰውነት ቁመት<br>በሴንቲሜትር |           |              |             | <input type="checkbox"/> |
| 303 | ቢምይ (BMI)            |           |              |             | <input type="checkbox"/> |

**ክፍል 4: የስነ ምግብ የምክርና የድጋፍ አገልግሎት ዳሰሳ**

| ተ.ቁ | መጠይቅ                                               | መልስ               | ኮድ                       |
|-----|----------------------------------------------------|-------------------|--------------------------|
| 401 | የስነ ምግብ የምክር አገልግሎት ከዚህ የጤና ድርጅት ያገኛሉ              | 1= አዎ<br>2= አይደለም | <input type="checkbox"/> |
| 402 | የተጨማሪ ምግብ ወይም የምግብ ድጋፍ ከዚህ ወይም ከሌላ ድርጅት አግኝተው ያውቃሉ | 1= አዎ<br>2= አይደለም | <input type="checkbox"/> |

**ክፍል 5: የቲቢ ህክምናና ውጤት በስድስተኛ ወር መጨረሻ**

| ተ.ቁ           | 501                      | 502                      | 503                      | 504                      | 505                      |
|---------------|--------------------------|--------------------------|--------------------------|--------------------------|--------------------------|
| የቲቢ ህክምናና ውጤት | ሕክምና የጨረሰ                | ሕክምና የተሳካ                | በሕክምና የዳነ                | ያቋረጠ                     | የሞተ                      |
| መልስ           | 1= አዎ<br>2= አይደለም        | 1= አዎ<br>2= አይደለም        | 1= አዎ<br>2= አይደለም        | 1= አዎ<br>2= አይደለም        | 1= አዎ<br>2= አይደለም        |
| ኮድ            | <input type="checkbox"/> | <input type="checkbox"/> | <input type="checkbox"/> | <input type="checkbox"/> | <input type="checkbox"/> |

ከመተ የሞተበት ቀን      ወር      ዓም

**ክፍል 6: የአክታ ምርመራ ውጤት (ለሳንባ ቲቢ)**

| ተ.ቁ          | 601                      | 602                      | 603                      | 604                      |
|--------------|--------------------------|--------------------------|--------------------------|--------------------------|
| የቲቢ ህክምናና ወር | ሁለተኛ ወር ሲጨርሱ             | በአመስተኛ ወር                | በስድስተኛ ወር መጨረሻ           | ያልተሳካ ሕክምና               |
| የአክታ ውጤት     | 1= ፖዘቲቭ<br>2= ኔጋቲቭ       | 1= ፖዘቲቭ<br>2= ኔጋቲቭ       | 1= ፖዘቲቭ<br>2= ኔጋቲቭ       | 1= አዎ<br>2= አይደለም        |
| ኮድ           | <input type="checkbox"/> | <input type="checkbox"/> | <input type="checkbox"/> | <input type="checkbox"/> |
